1 Vaccine-related misinformation and attitude toward COVID-19 vaccination in Japan

2

3 Yuki Furuse<sup>1,2,\*</sup>

4 Takahiro Tabuchi<sup>3,4</sup>

5

6 1 Department of Microbiology and Infection; The University of Tokyo Pandemic Preparedness,

7 Infection and Advanced Research Center (UTOPIA); The University of Tokyo; Tokyo; Japan

8 2 Department of Medical Virology, Nagasaki University Graduate School of Biomedical

9 Sciences, Nagasaki, Japan

10 3 Division of Epidemiology, School of Public Health, Tohoku University Graduate School of

11 Medicine, Sendai, Japan

12 4 Cancer Control Center, Osaka International Cancer Institute, Osaka, Japan

13

14 \* Correspondence:

15 4-6-1 Shirokanedai, Minato City, Tokyo 108-8639, Japan

16 Tel: +81 364092253

17 E-mail: furusey.tokyo@gmail.com

18

19 Keywords

20 COVID-19; vaccination; vaccine hesitancy; misinformation; online survey

21

## 22 **Abstract**

23           We have struggled with vaccine hesitancy for vaccination rollout during the COVID-19  
24 pandemic. Although the spread of misinformation seems to play a role in vaccine hesitancy,  
25 the extent to which it affects attitudes toward COVID-19 vaccination is unknown. Here, we  
26 investigated the prevalence of beliefs about misinformation regarding COVID-19 vaccines in  
27 vaccinated and unvaccinated populations in Japan and analyzed associated risk factors. An  
28 online survey of 31,000 participants in 2021 found that 8.1% of vaccine-accepted individuals  
29 believed vaccine-related misinformation, whereas 36.6% of those who refused vaccination  
30 believed misinformation. Most factors associated with beliefs about misinformation and  
31 vaccine hesitancy overlapped, including young age, unmarried status, low income, particular  
32 information sources, and history of COVID-19 infection. Interestingly, some factors, such as  
33 age and sources of information, had different effects on vaccine acceptance between  
34 individuals who did not believe misinformation and those who did. Advanced age was  
35 associated with vaccine acceptance among non-misinformation believers. In contrast,  
36 misinformation believers in their 10s and 20s were more willing to be vaccinated than older  
37 adults. The effects of television and Internet information were stronger in individuals who  
38 believed misinformation on their attitude toward vaccination than non-misinformation  
39 believers. This study highlights the importance of understanding the relationship between  
40 beliefs about misinformation and vaccine hesitancy for ongoing and future pandemics.

41

## 42 **Background**

43           The COVID-19 pandemic has caused substantial morbidity and mortality worldwide. To  
44 reduce the death toll, novel vaccines have been developed and administered (1). Vaccination  
45 for COVID-19 in Japan started in February 2021. During the time, “one million shots per day”  
46 was aimed by the Japanese government to increase vaccination coverage as high and as  
47 rapidly as possible (2).

48           However, we have faced vaccine hesitancy at that time. Many people are especially  
49 concerned about the effectiveness and safety of mRNA vaccines, a new biomedical  
50 technology that had not been practically applied before the pandemic (3). Furthermore,  
51 misinformation regarding COVID-19 and its vaccines has spread worldwide, dubbed an  
52 infodemic (4,5). Those include unfounded allegations like “governments hide the causal  
53 association between vaccination and autism” or “the COVID-19 pandemic was caused by a  
54 man-made virus to control the global population by vaccination.” Such misinformation has  
55 been reported to be associated with vaccine hesitancy (6).

56           Still, some people must have received vaccination even if they believed vaccine-related  
57 misinformation. How often that happened and what determined the behavior are largely  
58 unknown. In this study, we investigated the prevalence of people who believed misinformation  
59 regarding COVID-19 vaccines by vaccination status, factors associated with misinformation  
60 beliefs, and how they have affected attitudes toward COVID-19 vaccination in Japan.

61

## 62 **Methods**

### 63 *Survey for vaccine hesitancy and beliefs about misinformation*

64           Data on vaccine hesitancy and beliefs about vaccine-related misinformation were  
65 collected in part of the Japan COVID-19 and Society Internet Survey (JACSIS) study (7). Briefly,

66 31,000 participants aged 15 years or older were recruited and asked about their demographic,  
67 economic, and health-related information through an online questionnaire between  
68 September and October 2021. Participants were asked whether they agreed with each of the  
69 seven sentences regarding vaccine-related misinformation ([Table 1](#)).

70 Responses from each participant were weighted using inverse probability weighting for  
71 participation in the JACSIS study to be adjusted to the general population in Japan, referring to  
72 the national data of the Comprehensive Survey of Living Conditions in 2019. Propensity scores  
73 were calculated by adjusting for residential address (prefecture), education level, marital  
74 status, and self-rated health consciousness (8,9).

75

#### 76 *Factors for vaccine hesitancy and misinformation beliefs*

77 Factors associated with vaccine hesitancy were tested with binomial regression  
78 analysis using the Stats package in R. Similarly, factors associated with the number of beliefs  
79 about vaccine-related misinformation were tested by ordered logistic regression analysis using  
80 the MASS package in R. Statistical adjustments were conducted for age groups where  
81 indicated. Statistical significance was set at  $P < 0.05$ .

82

#### 83 *Ethical consideration*

84 The protocol for the JACSIS study was reviewed and approved by the Institutional  
85 Review Board of the Osaka International Cancer Institute (No. 20084). The survey results were  
86 anonymized, and all study participants agreed that their response data would be used for  
87 analysis and publication.

88

## 89 **Results**

90 Of the 31,000 participants in the JACSIS study in 2021, 28,175 (90.9 %) provided valid  
91 responses (7). Among them, 83.2% (23,435) were already vaccinated for COVID-19, 3.4% (968)  
92 were waiting for vaccination, 6.2% (1,740) were undecided about whether to get vaccinated,  
93 6.4% (1,800) decided not to get vaccinated, and 0.8% (232) responded that they could not get  
94 vaccinated for medical reasons, such as allergies (Table 2).

95 No vaccine-related misinformation was believed in 88.9% (25,041) of the participants.  
96 Among the already vaccinated people, 8.1% believed at least one of the seven misinformation  
97 items (Table 1, Figure 1A and Supplementary Figure 1). In contrast, 36.6% of those who refused  
98 vaccination believed misinformation. To put it the other way around, 88.1% of people who did  
99 not believe misinformation were willing to be vaccinated, while 63.6% of misinformation  
100 believers accepted vaccination (Figure 1B). Vaccine acceptance rates declined as the number  
101 of believed misinformation items increased.

102 Younger age; living by oneself; unmarried; lower education level; not having physical  
103 comorbidity; having a mental illness; history of COVID-19 infection; not knowing friends who  
104 had contracted COVID-19 before; not getting information about COVID-19 and its vaccination  
105 from friends, medical doctors, governments, newspapers, or television; getting information  
106 from the Internet including social media; and lower income were significantly associated with  
107 vaccine hesitancy (Table 3). In addition, the number of believed vaccine-related  
108 misinformation items was strongly associated with vaccine hesitancy, with odds ratios ranging  
109 from 2.1 (believed one misinformation item) to 17.5 (believed seven misinformation items).  
110 Hence, many factors associated with vaccine hesitancy overlapped with those related to  
111 beliefs about misinformation. Younger age; living by oneself; unmarried; having a mental  
112 illness; history of COVID-19 infection; having family members and friends who had contracted  
113 COVID-19 before; not getting information from governments, newspapers, or television; getting

114 information from the Internet; and lower income were significantly associated with an increase  
115 in the number of believed misinformation items ([Table 4](#)).

116 We noticed that many people who believed vaccine-related misinformation still  
117 accepted vaccination ([Figure 1B](#)) and wondered whether any factors affected their attitudes  
118 toward vaccination differently between individuals who did not believe misinformation and  
119 those who did. [Figure 2](#) shows the odds ratios for vaccine hesitancy in the two stratified groups.  
120 Although the direction of the associations was the same for most factors between the two  
121 groups, two findings were notable. First, age had the opposite effect. Whereas older age  
122 showed a strong association with vaccine acceptance among non-misinformation believers,  
123 there was a positive association between younger age and vaccine acceptance among  
124 misinformation believers. Second, the effects of some information sources were more evident  
125 among individuals who believed misinformation. The association between an information  
126 source from television and vaccine acceptance was stronger among misinformation believers  
127 than non-misinformation believers. An information source from the Internet was found to be  
128 more closely linked to vaccine hesitancy in misinformation believers than in non-  
129 misinformation believers.

130

## 131 **Discussion**

132 In this study, we reported the prevalence of people who believed vaccine-related  
133 misinformation in vaccinated and unvaccinated populations in Japan through an online survey  
134 that included over 30,000 participants. We also identified the risk factors associated with  
135 misinformation beliefs and vaccine hesitancy.

136 The spread of misinformation and vaccine hesitancy are major hurdles in the fight  
137 against COVID-19. As with previous studies, we found that many factors, such as the absence

138 of cohabiters, low income, particular information sources, and history of COVID-19 infection,  
139 are associated with misinformation beliefs and vaccination reluctance (10–12). An interesting  
140 observation of the present study is that the effect of misinformation on vaccine hesitancy is  
141 weak in the younger generation (Figure 2 and Supplementary Figure 1B), although COVID-19  
142 vaccination coverage is generally high for older adults (1). While information from the Internet  
143 helps misinformation-believers have a more obstinate attitude toward vaccine hesitancy,  
144 information from television showed a positive effect on vaccine acceptance, even for  
145 individuals who believed vaccine-related misinformation. Further studies on these  
146 mechanisms will allow us to develop effective strategies to increase vaccination coverage in  
147 the midst of an infodemic.

148 Our study has several limitations. The generalizability of the results is limited, as we  
149 conducted the survey only for residents of Japan at a certain time. As the participants were  
150 recruited through an online platform, we cannot rule out the existence of selection bias.  
151 Although we statistically adjusted our data to the general population in the country, this could  
152 have been insufficient. In addition, the self-report of vaccination status in the survey was not  
153 verified by official records.

154 COVID-19 vaccination coverage in Japan is very high, reaching >80% of eligible people  
155 by the end of 2021 (1). We found that 88.9% of the study participants did not believe vaccine-  
156 related misinformation. In addition, among those who believed misinformation, 63.6%  
157 accepted vaccination. However, there is a growing trend of vaccine hesitancy today. For  
158 example, the coverage of regular vaccinations, such as one for measles, has recently  
159 decreased in Japan and other countries (13,14). As the spread of misinformation repeatedly  
160 hinders countermeasures for past infectious disease outbreaks (15), this tide should not be

161 disregarded for the next pandemic. Our study underscores the importance of understanding  
162 risk factors for misinformation beliefs in relation to vaccine hesitancy.  
163



164 **Data availability**

165 All data produced in the present study are available upon reasonable request to the  
166 authors.

167

168 **Author contributions**

169 TT was a major contributor to the JACSIS survey. YF analyzed and interpreted the data  
170 and wrote the first draft. All authors read and approved the final manuscript.

171

172 **Acknowledgments**

173 This work was supported by the Strategic Center of Biomedical Advanced Vaccine  
174 Research and Development for Preparedness and Response (JP243fa627001 and  
175 JP243fa627004) from the Japan Agency for Medical Research and Development; by the Grant-  
176 in-Aid for Scientific Research (JP16KK0059, JP18H03107, JP19K10446, JP19KK0204,  
177 JP21H04856, and JP23K09693) from the Japan Society for the Promotion of Science; by the  
178 Health Labour Sciences Research Grants (19FA1012) from the Ministry of Health, Labour and  
179 Welfare; by the Innovative Research Program on Suicide Countermeasures (R3-2-2) from the  
180 Japan Suicide Countermeasures Promotion Center; by the Grants from Chiba Foundation for  
181 Health Promotion & Disease Prevention (grant number not available); and by the Nagasaki  
182 University State of the Art Research program from Nagasaki University (grant number not  
183 available). The funders had no role in the study design, data collection and analysis, decision  
184 to publish, or preparation of the manuscript.

185

186 **References**

- 187 1. Digital Agency. Vaccination Record System [Internet]. [cited 2024 May 1]. Available from:  
188 <https://info.vrs.digital.go.jp/>
- 189 2. Kayano T, Ko Y, Otani K, Kobayashi T, Suzuki M, Nishiura H. Evaluating the COVID-19  
190 vaccination program in Japan, 2021 using the counterfactual reproduction number. *Sci*  
191 *Rep.* 2023 Oct 18;13(1):17762.
- 192 3. Lazarus JV, Wyka K, White TM, Picchio CA, Rabin K, Ratzan SC, et al. Revisiting COVID-19  
193 vaccine hesitancy around the world using data from 23 countries in 2021. *Nat Commun.*  
194 2022 Jul 1;13(1):3801.
- 195 4. Borges do Nascimento IJ, Pizarro AB, Almeida JM, Azzopardi-Muscat N, Gonçalves MA,  
196 Björklund M, et al. Infodemics and health misinformation: a systematic review of reviews.  
197 *Bull World Health Organ.* 2022 Sep 1;100(9):544–61.
- 198 5. Gallotti R, Valle F, Castaldo N, Sacco P, De Domenico M. Assessing the risks of  
199 “infodemics” in response to COVID-19 epidemics. *Nat Hum Behav.* 2020 Dec;4(12):1285–  
200 93.
- 201 6. Loomba S, de Figueiredo A, Piatek SJ, de Graaf K, Larson HJ. Measuring the impact of  
202 COVID-19 vaccine misinformation on vaccination intent in the UK and USA. *Nat Hum*  
203 *Behav.* 2021 Mar;5(3):337–48.
- 204 7. Murayama H, Suda T, Nakamoto I, Shinozaki T, Tabuchi T. Changes in social isolation and  
205 loneliness prevalence during the COVID-19 pandemic in Japan: The JACSIS 2020-2021  
206 study. *Front Public Health.* 2023 Feb 16;11:1094340.
- 207 8. Tabuchi T, Kiyohara K, Hoshino T, Bekki K, Inaba Y, Kunugita N. Awareness and use of  
208 electronic cigarettes and heat-not-burn tobacco products in Japan. *Addiction.* 2016  
209 Apr;111(4):706–13.
- 210 9. Tabuchi T, Shinozaki T, Kunugita N, Nakamura M, Tsuji I. Study Profile: The Japan “Society  
211 and New Tobacco” Internet Survey (JASTIS): A Longitudinal Internet Cohort Study of Heat-  
212 Not-Burn Tobacco Products, Electronic Cigarettes, and Conventional Tobacco Products in  
213 Japan. *J Epidemiol.* 2019 Nov 5;29(11):444–50.
- 214 10. Ghaznavi C, Yoneoka D, Kawashima T, Eguchi A, Murakami M, Gilmour S, et al. Factors  
215 associated with reversals of COVID-19 vaccination willingness: Results from two  
216 longitudinal, national surveys in Japan 2021-2022. *Lancet Reg Health West Pac.* 2022  
217 Oct;27:100540.
- 218 11. Okubo R, Yoshioka T, Ohfuji S, Matsuo T, Tabuchi T. COVID-19 Vaccine Hesitancy and Its  
219 Associated Factors in Japan. *Vaccines (Basel)* [Internet]. 2021 Jun 17;9(6). Available from:  
220 <http://dx.doi.org/10.3390/vaccines9060662>
- 221 12. Soares P, Rocha JV, Moniz M, Gama A, Laires PA, Pedro AR, et al. Factors Associated with  
222 COVID-19 Vaccine Hesitancy. *Vaccines (Basel)* [Internet]. 2021 Mar 22;9(3). Available  
223 from: <http://dx.doi.org/10.3390/vaccines9030300>

- 224 13. Japan Pediatric Society. Situation about MR vaccination coverage [Japanese] [Internet].  
225 Available from: [https://www.jpeds.or.jp/uploads/files/20240401\\_MR\\_wakuchin.pdf](https://www.jpeds.or.jp/uploads/files/20240401_MR_wakuchin.pdf)
- 226 14. Kaur G, Danovaro-Holliday MC, Mwinnyaa G, Gacic-Dobo M, Francis L, Grevendonk J, et  
227 al. Routine Vaccination Coverage - Worldwide, 2022. *MMWR Morb Mortal Wkly Rep.* 2023  
228 Oct 27;72(43):1155–61.
- 229 15. Jin SL, Kolis J, Parker J, Proctor DA, Prybylski D, Wardle C, et al. Social histories of public  
230 health misinformation and infodemics: case studies of four pandemics. *Lancet Infect Dis*  
231 [Internet]. 2024 Apr 19; Available from: [http://dx.doi.org/10.1016/S1473-3099\(24\)00105-1](http://dx.doi.org/10.1016/S1473-3099(24)00105-1)

232

233 **Tables**

234 Table 1 Seven vaccine-related misinformation sentences asked in JACSIS

| Misinformation regarding COVID-19 vaccines                                   |
|------------------------------------------------------------------------------|
| 1. The reported data about vaccine safety are fabricated.                    |
| 2. Vaccines for infants and children are harmful, but the fact is concealed. |
| 3. Pharmaceutical companies hide safety concerns in vaccines.                |
| 4. Citizens are deceived about the effectiveness of vaccines.                |
| 5. The reported data about vaccine effectiveness are fabricated.             |
| 6. Citizens are deceived about the safety of vaccines.                       |
| 7. Governments hide the causal association between vaccination and autism.   |

235

236

237 Table 2 Summary of JACSIS study about vaccine hesitancy and beliefs about vaccine-related

238 misinformation

| Age group | All participants | Valid responders | Percent of valid responders | Vaccine acceptance |                                 |              |                          |                                                     | Number of believed vaccine-related misinformation items |              |            |            |            |            |            |            |
|-----------|------------------|------------------|-----------------------------|--------------------|---------------------------------|--------------|--------------------------|-----------------------------------------------------|---------------------------------------------------------|--------------|------------|------------|------------|------------|------------|------------|
|           |                  |                  |                             | Already vaccinated | Want to be vaccinated (waiting) | Wondering    | Refuse to get vaccinated | Unable to get vaccinated because of medical reasons | 0                                                       | 1            | 2          | 3          | 4          | 5          | 6          | 7          |
| 10        | 645              | 573              | 88.8%                       | 434 (75.7%)        | 37 (6.5%)                       | 44 (7.7%)    | 52 (9.1%)                | 6 (1.0%)                                            | 471 (82.2%)                                             | 53 (9.2%)    | 24 (4.2%)  | 11 (1.9%)  | 6 (1.0%)   | 2 (0.3%)   | 3 (0.5%)   | 3 (0.5%)   |
| 20        | 4,107            | 3,626            | 88.3%                       | 2,767 (76.3%)      | 223 (6.2%)                      | 307 (8.5%)   | 305 (8.4%)               | 24 (0.7%)                                           | 3,055 (84.3%)                                           | 286 (7.9%)   | 127 (3.5%) | 45 (1.2%)  | 31 (0.9%)  | 28 (0.8%)  | 17 (0.5%)  | 37 (1.0%)  |
| 30        | 4,652            | 4,149            | 89.2%                       | 3,077 (74.2%)      | 270 (6.5%)                      | 398 (9.6%)   | 371 (8.9%)               | 33 (0.8%)                                           | 3,589 (86.5%)                                           | 231 (5.6%)   | 99 (2.4%)  | 61 (1.5%)  | 24 (0.6%)  | 32 (0.8%)  | 39 (0.9%)  | 74 (1.8%)  |
| 40        | 6,078            | 5,454            | 89.7%                       | 4,330 (79.4%)      | 240 (4.4%)                      | 430 (7.9%)   | 388 (7.1%)               | 66 (1.2%)                                           | 4,798 (88.0%)                                           | 246 (4.5%)   | 115 (2.1%) | 55 (1.0%)  | 56 (1.0%)  | 46 (0.8%)  | 50 (0.9%)  | 88 (1.6%)  |
| 50        | 5,289            | 4,785            | 90.5%                       | 3,999 (83.6%)      | 147 (3.1%)                      | 291 (6.1%)   | 311 (6.5%)               | 37 (0.8%)                                           | 4,274 (89.3%)                                           | 207 (4.3%)   | 73 (1.5%)  | 39 (0.8%)  | 28 (0.6%)  | 33 (0.7%)  | 68 (1.4%)  | 63 (1.3%)  |
| 60        | 5,267            | 4,882            | 92.7%                       | 4,441 (91.0%)      | 35 (0.7%)                       | 160 (3.3%)   | 209 (4.3%)               | 37 (0.8%)                                           | 4,489 (92.0%)                                           | 177 (3.6%)   | 49 (1.0%)  | 36 (0.7%)  | 19 (0.4%)  | 26 (0.5%)  | 28 (0.6%)  | 58 (1.2%)  |
| 70        | 4,962            | 4,706            | 94.8%                       | 4,387 (93.2%)      | 16 (0.3%)                       | 110 (2.3%)   | 164 (3.5%)               | 29 (0.6%)                                           | 4,365 (92.8%)                                           | 162 (3.4%)   | 46 (1.0%)  | 27 (0.6%)  | 31 (0.7%)  | 23 (0.5%)  | 22 (0.5%)  | 30 (0.6%)  |
| Total     | 31,000           | 28,175           | 90.9%                       | 23,435 (83.2%)     | 968 (3.4%)                      | 1,740 (6.2%) | 1,800 (6.4%)             | 232 (0.8%)                                          | 25,041 (88.9%)                                          | 1,362 (4.8%) | 533 (1.9%) | 274 (1.0%) | 195 (0.7%) | 190 (0.7%) | 227 (0.8%) | 353 (1.3%) |

239

240

241 Table 3 Risk factors for vaccine hesitancy

| Category                      | Variable                        | Vaccination                  |                                  | Unadjusted              |                   | Age-adjusted               |                   |
|-------------------------------|---------------------------------|------------------------------|----------------------------------|-------------------------|-------------------|----------------------------|-------------------|
|                               |                                 | Willing (already or waiting) | Reluctant (wondering or refused) | Odds ratio              | P-value           | Odds ratio                 | P-value           |
| Sex                           | Male                            | 12042 (86.8%)                | 1744 (12.6%)                     | Reference               |                   | Reference                  |                   |
|                               | Female                          | 12361 (86.4%)                | 1796 (12.6%)                     | 1.00 (0.93–1.08)        | 0.9283            | 1.02 (0.95–1.1)            | 0.5007            |
| Age                           | 15–19                           | 471 (82.2%)                  | 96 (16.8%)                       | 1.14 (0.9–1.43)         | 0.272             |                            |                   |
|                               | 20–29                           | 2990 (82.5%)                 | 612 (16.9%)                      | <b>1.14 (1.02–1.28)</b> | <b>0.0216</b>     |                            |                   |
|                               | 30–39                           | 3347 (80.7%)                 | 769 (18.5%)                      | <b>1.28 (1.15–1.43)</b> | <b>&lt;0.0001</b> |                            |                   |
|                               | 40–49                           | 4570 (83.8%)                 | 818 (15.0%)                      | Reference               |                   |                            |                   |
|                               | 50–59                           | 4146 (86.6%)                 | 602 (12.6%)                      | <b>0.81 (0.72–0.91)</b> | <b>&lt;0.0001</b> |                            |                   |
|                               | 60–69                           | 4476 (91.7%)                 | 369 (7.6%)                       | <b>0.46 (0.40–0.52)</b> | <b>&lt;0.0001</b> |                            |                   |
|                               | 70–                             | 4403 (93.6%)                 | 274 (5.8%)                       | 0.35 (0.30–0.40)        | 0.3695            |                            |                   |
| Living                        | By oneself                      | 4818 (81.5%)                 | 1027 (17.4%)                     | 1.66 (1.53–1.80)        | <0.0001           | <b>1.59 (1.46–1.72)</b>    | <b>&lt;0.0001</b> |
| Marital status                | Married                         | 15247 (89.9%)                | 1604 (9.5%)                      | 0.50 (0.46–0.53)        | <0.0001           | <b>0.57 (0.52–0.61)</b>    | <b>&lt;0.0001</b> |
| Education level               | Junior high school              | 276 (74.4%)                  | 86 (23.2%)                       | 2.07 (1.60–2.65)        | <0.0001           | <b>2.23 (1.71–2.87)</b>    | <b>&lt;0.0001</b> |
|                               | High school                     | 6224 (86.1%)                 | 938 (13.0%)                      | Reference               |                   | Reference                  |                   |
|                               | University/college              | 14865 (87.7%)                | 1957 (11.5%)                     | 0.87 (0.80–0.95)        | 0.0015            | <b>0.74 (0.68–0.81)</b>    | <b>&lt;0.0001</b> |
|                               | Graduate school                 | 1127 (89.9%)                 | 124 (9.9%)                       | 0.73 (0.60–0.89)        | 0.0018            | <b>0.57 (0.46–0.69)</b>    | <b>&lt;0.0001</b> |
| Comorbidity                   | Physical illness                | 14760 (88.4%)                | 1760 (10.5%)                     | 0.65 (0.60–0.69)        | <0.0001           | <b>0.78 (0.72–0.84)</b>    | <b>&lt;0.0001</b> |
|                               | Mental illness                  | 1645 (81.4%)                 | 331 (16.4%)                      | 1.43 (1.26–1.61)        | <0.0001           | <b>1.29 (1.14–1.46)</b>    | <b>0.0001</b>     |
| COVID-19 infection history    | Self                            | 399 (77.9%)                  | 91 (17.8%)                       | 1.59 (1.25–1.99)        | 0.0001            | <b>1.36 (1.02–1.80)</b>    | <b>0.0318</b>     |
|                               | Family member                   | 424 (79.5%)                  | 84 (15.8%)                       | 1.37 (1.08–1.73)        | 0.0084            | 1.09 (0.81–1.45)           | 0.5503            |
|                               | Friend                          | 2063 (86.4%)                 | 284 (11.9%)                      | 0.94 (0.83–1.07)        | 0.3874            | <b>0.73 (0.63–0.83)</b>    | <b>&lt;0.0001</b> |
| Information source            | Family member                   | 12638 (89.4%)                | 1376 (9.7%)                      | 0.59 (0.55–0.64)        | <0.0001           | 1.04 (0.95–1.13)           | 0.443             |
|                               | Friend                          | 13355 (89.8%)                | 1406 (9.4%)                      | 0.55 (0.51–0.59)        | <0.0001           | <b>0.70 (0.63–0.76)</b>    | <b>&lt;0.0001</b> |
|                               | Medical doctor                  | 7799 (92.7%)                 | 529 (6.3%)                       | 0.37 (0.34–0.41)        | <0.0001           | <b>0.60 (0.54–0.66)</b>    | <b>&lt;0.0001</b> |
|                               | Expert                          | 10083 (90.5%)                | 968 (8.7%)                       | 0.53 (0.49–0.58)        | <0.0001           | 0.97 (0.89–1.07)           | 0.5594            |
|                               | Government                      | 11575 (91.1%)                | 1019 (8.0%)                      | 0.45 (0.41–0.48)        | <0.0001           | <b>0.66 (0.61–0.72)</b>    | <b>&lt;0.0001</b> |
|                               | Internet including social media | 17411 (87.2%)                | 2375 (11.9%)                     | 0.82 (0.76–0.88)        | <0.0001           | <b>1.48 (1.35–1.62)</b>    | <b>&lt;0.0001</b> |
|                               | Newspaper                       | 11218 (92.0%)                | 883 (7.2%)                       | 0.39 (0.36–0.42)        | <0.0001           | <b>0.69 (0.63–0.76)</b>    | <b>&lt;0.0001</b> |
|                               | Television                      | 20429 (89.4%)                | 2238 (9.8%)                      | 0.33 (0.31–0.36)        | <0.0001           | <b>0.48 (0.43–0.52)</b>    | <b>&lt;0.0001</b> |
| Income                        | 0–3 million JPY                 | 3977 (81.7%)                 | 811 (16.7%)                      | 1.58 (1.43–1.74)        | <0.0001           | <b>1.82 (1.64–2.02)</b>    | <b>&lt;0.0001</b> |
|                               | 3–6 million JPY                 | 7593 (87.9%)                 | 982 (11.4%)                      | Reference               |                   | Reference                  |                   |
|                               | 6–9 million JPY                 | 4362 (89.3%)                 | 494 (10.1%)                      | 0.88 (0.78–0.98)        | 0.0229            | <b>0.73 (0.65–0.82)</b>    | <b>&lt;0.0001</b> |
|                               | 9–12 million JPY                | 2078 (90.8%)                 | 198 (8.7%)                       | 0.74 (0.63–0.86)        | 0.0002            | <b>0.62 (0.52–0.73)</b>    | <b>&lt;0.0001</b> |
|                               | 12 million– JPY                 | 1300 (89.7%)                 | 138 (9.5%)                       | 0.82 (0.68–0.99)        | 0.0391            | <b>0.72 (0.59–0.87)</b>    | <b>0.0007</b>     |
| Believed misinformation items | 0                               | 22404 (89.5%)                | 2464 (9.8%)                      | Reference               |                   | Reference                  |                   |
|                               | 1                               | 1068 (78.4%)                 | 272 (20.0%)                      | 2.32 (2.01–2.66)        | <0.0001           | <b>2.12 (1.84–2.44)</b>    | <b>&lt;0.0001</b> |
|                               | 2                               | 358 (67.2%)                  | 165 (31.0%)                      | 4.19 (3.46–5.05)        | <0.0001           | <b>3.65 (3.01–4.42)</b>    | <b>&lt;0.0001</b> |
|                               | 3                               | 171 (62.4%)                  | 94 (34.3%)                       | 5.00 (3.86–6.43)        | <0.0001           | <b>4.56 (3.51–5.90)</b>    | <b>&lt;0.0001</b> |
|                               | 4                               | 114 (58.5%)                  | 77 (39.5%)                       | 6.14 (4.57–8.21)        | <0.0001           | <b>5.98 (4.43–8.04)</b>    | <b>&lt;0.0001</b> |
|                               | 5                               | 90 (47.4%)                   | 97 (51.1%)                       | 9.8 (7.33–13.11)        | <0.0001           | <b>9.59 (7.13–12.91)</b>   | <b>&lt;0.0001</b> |
|                               | 6                               | 79 (34.8%)                   | 141 (62.1%)                      | 16.23 (12.32–21.53)     | <0.0001           | <b>16.33 (12.33–21.78)</b> | <b>&lt;0.0001</b> |
|                               | 7                               | 119 (33.7%)                  | 230 (65.2%)                      | 17.57 (14.06–22.07)     | <0.0001           | <b>17.46 (13.91–22.03)</b> | <b>&lt;0.0001</b> |
| Total                         |                                 | 24403 (86.6%)                | 3540 (12.6%)                     |                         |                   |                            |                   |

242 Significance after age adjustment is in bold.

243

244 Table 4 Risk factors for misinformation beliefs

| Category                   | Variable                        | Number of believed vaccine-related misinformation items |             |            |            |            |            |            |            | Unadjusted              |                   | Age-adjusted            |                   |
|----------------------------|---------------------------------|---------------------------------------------------------|-------------|------------|------------|------------|------------|------------|------------|-------------------------|-------------------|-------------------------|-------------------|
|                            |                                 | 0                                                       | 1           | 2          | 3          | 4          | 5          | 6          | 7          | Odds ratio              | P-value           | Odds ratio              | P-value           |
| Sex                        | Male                            | 12275 (88.5%)                                           | 717 (5.2%)  | 272 (2.0%) | 141 (1.0%) | 93 (0.7%)  | 83 (0.6%)  | 104 (0.7%) | 185 (1.3%) | Reference               |                   | Reference               |                   |
|                            | Female                          | 12766 (89.2%)                                           | 645 (4.5%)  | 261 (1.8%) | 133 (0.9%) | 102 (0.7%) | 107 (0.7%) | 123 (0.9%) | 168 (1.2%) | 0.93 (0.87-1.00)        | 0.0628            | 0.95 (0.88-1.02)        | 0.1388            |
| Age                        | 15-19                           | 471 (82.2%)                                             | 53 (9.2%)   | 24 (4.2%)  | 11 (1.9%)  | 6 (1.0%)   | 2 (0.3%)   | 3 (0.5%)   | 3 (0.5%)   | <b>1.51 (1.20-1.88)</b> | <b>0.0004</b>     |                         |                   |
|                            | 20-29                           | 3055 (84.3%)                                            | 286 (7.9%)  | 127 (3.5%) | 45 (1.2%)  | 31 (0.9%)  | 28 (0.8%)  | 17 (0.5%)  | 37 (1.0%)  | <b>1.32 (1.17-1.49)</b> | <b>&lt;0.0001</b> |                         |                   |
|                            | 30-39                           | 3589 (86.5%)                                            | 231 (5.6%)  | 99 (2.4%)  | 61 (1.5%)  | 24 (0.6%)  | 32 (0.8%)  | 39 (0.9%)  | 74 (1.8%)  | <b>1.13 (1.00-1.28)</b> | <b>0.0413</b>     |                         |                   |
|                            | 40-49                           | 4798 (88.0%)                                            | 246 (4.5%)  | 115 (2.1%) | 55 (1.0%)  | 56 (1.0%)  | 46 (0.8%)  | 50 (0.9%)  | 88 (1.6%)  | Reference               |                   |                         |                   |
|                            | 50-59                           | 4274 (89.3%)                                            | 207 (4.3%)  | 73 (1.5%)  | 39 (0.8%)  | 28 (0.6%)  | 33 (0.7%)  | 68 (1.4%)  | 63 (1.3%)  | <b>0.87 (0.77-0.99)</b> | <b>0.0301</b>     |                         |                   |
|                            | 60-69                           | 4489 (82.0%)                                            | 177 (3.6%)  | 49 (1.0%)  | 36 (0.7%)  | 19 (0.4%)  | 26 (0.5%)  | 28 (0.6%)  | 58 (1.2%)  | <b>0.64 (0.56-0.72)</b> | <b>&lt;0.0001</b> |                         |                   |
|                            | 70+                             | 4365 (92.8%)                                            | 162 (3.4%)  | 46 (1.0%)  | 27 (0.6%)  | 31 (0.7%)  | 23 (0.5%)  | 22 (0.5%)  | 30 (0.6%)  | <b>0.56 (0.49-0.65)</b> | <b>&lt;0.0001</b> |                         |                   |
| Living                     | By oneself                      | 5145 (87.1%)                                            | 352 (6.0%)  | 124 (2.1%) | 67 (1.1%)  | 38 (0.6%)  | 45 (0.8%)  | 53 (0.9%)  | 86 (1.5%)  | 1.24 (1.14-1.35)        | <0.0001           | <b>1.17 (1.07-1.27)</b> | <b>0.0007</b>     |
| Marital status             | Married                         | 15309 (90.2%)                                           | 743 (4.4%)  | 252 (1.5%) | 148 (0.9%) | 103 (0.6%) | 94 (0.6%)  | 135 (0.8%) | 185 (1.1%) | 0.72 (0.66-0.77)        | <0.0001           | <b>0.86 (0.79-0.93)</b> | <b>0.0002</b>     |
| Education level            | Junior high school              | 329 (88.7%)                                             | 14 (3.8%)   | 12 (3.2%)  | 2 (0.5%)   | 4 (1.1%)   | 5 (1.3%)   | 4 (1.1%)   | 1 (0.3%)   | 1.18 (0.84-1.62)        | 0.003             | 1.18 (0.84-1.63)        | 0.3223            |
|                            | High school                     | 6519 (90.2%)                                            | 300 (4.2%)  | 120 (1.7%) | 60 (0.8%)  | 48 (0.7%)  | 43 (0.6%)  | 45 (0.6%)  | 92 (1.3%)  | Reference               |                   | Reference               |                   |
|                            | University/college              | 15072 (88.9%)                                           | 811 (4.8%)  | 297 (1.8%) | 174 (1.0%) | 110 (0.6%) | 120 (0.7%) | 151 (0.9%) | 218 (1.3%) | 1.15 (1.05-1.26)        | 0.003             | 1.06 (0.96-1.16)        | 0.2435            |
|                            | Graduate school                 | 1117 (89.1%)                                            | 62 (4.9%)   | 26 (2.1%)  | 7 (0.6%)   | 9 (0.7%)   | 6 (0.5%)   | 6 (0.5%)   | 20 (1.6%)  | 1.12 (0.92-1.35)        | 0.2671            | 0.99 (0.81-1.20)        | 0.8907            |
| Comorbidity                | Physical illness                | 14883 (89.1%)                                           | 786 (4.7%)  | 337 (2.0%) | 169 (1.0%) | 98 (0.6%)  | 114 (0.7%) | 134 (0.8%) | 179 (1.1%) | 0.94 (0.87-1.01)        | 0.0998            | 1.06 (0.98-1.14)        | 0.1765            |
|                            | Mental illness                  | 1643 (81.3%)                                            | 153 (7.6%)  | 92 (4.6%)  | 30 (1.5%)  | 15 (0.7%)  | 29 (1.4%)  | 20 (1.0%)  | 39 (1.9%)  | 1.94 (1.72-2.18)        | <0.0001           | <b>1.73 (1.53-1.94)</b> | <b>&lt;0.0001</b> |
| COVID-19 infection history | Self                            | 363 (70.9%)                                             | 75 (14.6%)  | 44 (8.6%)  | 19 (3.7%)  | 4 (0.8%)   | 0 (0%)     | 1 (0.2%)   | 6 (1.2%)   | 3.08 (2.54-3.70)        | <0.0001           | <b>1.62 (1.26-2.07)</b> | <b>0.0002</b>     |
|                            | Family member                   | 377 (70.7%)                                             | 70 (13.1%)  | 50 (9.4%)  | 20 (3.8%)  | 5 (0.9%)   | 3 (0.6%)   | 1 (0.2%)   | 7 (1.3%)   | 3.16 (2.62-3.79)        | <0.0001           | <b>1.90 (1.49-2.42)</b> | <b>&lt;0.0001</b> |
|                            | Friend                          | 1999 (83.7%)                                            | 166 (7.0%)  | 86 (3.6%)  | 36 (1.5%)  | 17 (0.7%)  | 20 (0.8%)  | 33 (1.4%)  | 30 (1.3%)  | 1.61 (1.44-1.81)        | <0.0001           | <b>1.19 (1.05-1.34)</b> | <b>0.0074</b>     |
| Information source         | Family member                   | 12682 (89.7%)                                           | 664 (4.7%)  | 242 (1.7%) | 118 (0.8%) | 90 (0.6%)  | 95 (0.7%)  | 104 (0.7%) | 141 (1.0%) | 0.84 (0.78-0.9)         | <0.0001           | 0.93 (0.85-1.02)        | 0.1472            |
|                            | Friend                          | 13258 (89.1%)                                           | 763 (5.1%)  | 264 (1.8%) | 148 (1.0%) | 105 (0.7%) | 96 (0.6%)  | 101 (0.7%) | 144 (1.0%) | 0.94 (0.87-1.01)        | 0.1064            | 1.02 (0.93-1.12)        | 0.685             |
|                            | Medical doctor                  | 7578 (90.0%)                                            | 384 (4.6%)  | 151 (1.8%) | 77 (0.9%)  | 54 (0.6%)  | 55 (0.7%)  | 43 (0.5%)  | 74 (0.9%)  | 0.84 (0.77-0.91)        | <0.0001           | 1.06 (0.96-1.16)        | 0.2267            |
|                            | Expert                          | 10022 (89.8%)                                           | 538 (4.8%)  | 201 (1.8%) | 89 (0.8%)  | 56 (0.5%)  | 57 (0.5%)  | 69 (0.6%)  | 113 (1.0%) | 0.83 (0.77-0.89)        | <0.0001           | 1.03 (0.94-1.13)        | 0.4996            |
|                            | Government                      | 11564 (91.0%)                                           | 526 (4.1%)  | 206 (1.6%) | 100 (0.8%) | 69 (0.5%)  | 66 (0.5%)  | 80 (0.6%)  | 97 (0.8%)  | 0.67 (0.62-0.72)        | <0.0001           | <b>0.71 (0.65-0.78)</b> | <b>&lt;0.0001</b> |
|                            | Internet including social media | 17659 (88.4%)                                           | 1012 (5.1%) | 398 (2.0%) | 208 (1.0%) | 138 (0.7%) | 139 (0.7%) | 174 (0.9%) | 240 (1.2%) | 1.17 (1.07-1.27)        | 0.0004            | <b>1.60 (1.45-1.77)</b> | <b>&lt;0.0001</b> |
|                            | Newspaper                       | 11123 (91.3%)                                           | 513 (4.2%)  | 174 (1.4%) | 94 (0.8%)  | 63 (0.5%)  | 63 (0.5%)  | 66 (0.5%)  | 93 (0.8%)  | 0.64 (0.59-0.69)        | <0.0001           | <b>0.88 (0.80-0.96)</b> | <b>0.0046</b>     |
|                            | Television                      | 20626 (90.3%)                                           | 1048 (4.6%) | 366 (1.6%) | 201 (0.9%) | 146 (0.6%) | 129 (0.6%) | 144 (0.6%) | 192 (0.8%) | 0.51 (0.47-0.56)        | <0.0001           | <b>0.53 (0.48-0.58)</b> | <b>&lt;0.0001</b> |
| Income                     | 0-3 million JPY                 | 4262 (87.5%)                                            | 262 (5.4%)  | 98 (2.0%)  | 58 (1.2%)  | 30 (0.6%)  | 32 (0.7%)  | 47 (1.0%)  | 81 (1.7%)  | 1.21 (1.08-1.35)        | 0.0007            | <b>1.29 (1.15-1.44)</b> | <b>&lt;0.0001</b> |
|                            | 3-6 million JPY                 | 7722 (89.4%)                                            | 395 (4.6%)  | 153 (1.8%) | 100 (1.2%) | 70 (0.8%)  | 49 (0.6%)  | 64 (0.7%)  | 83 (1.0%)  | Reference               |                   | Reference               |                   |
|                            | 6-9 million JPY                 | 4348 (89.0%)                                            | 242 (5.0%)  | 92 (1.9%)  | 55 (1.1%)  | 23 (0.5%)  | 33 (0.7%)  | 35 (0.7%)  | 55 (1.1%)  | 1.04 (0.93-1.16)        | 0.5246            | 0.94 (0.83-1.05)        | 0.2516            |
|                            | 9-12 million JPY                | 2015 (88.0%)                                            | 133 (5.8%)  | 40 (1.7%)  | 15 (0.7%)  | 20 (0.9%)  | 18 (0.8%)  | 20 (0.9%)  | 28 (1.2%)  | 1.14 (0.99-1.32)        | 0.0667            | 1.03 (0.89-1.19)        | 0.7007            |
|                            | 12 million+ JPY                 | 1268 (87.5%)                                            | 70 (4.8%)   | 40 (2.8%)  | 9 (0.6%)   | 14 (1.0%)  | 12 (0.8%)  | 15 (1.0%)  | 21 (1.4%)  | 1.21 (1.02-1.43)        | 0.0256            | 1.12 (0.94-1.33)        | 0.183             |
| Total                      |                                 | 25041 (88.9%)                                           | 1362 (4.8%) | 533 (1.9%) | 274 (1.0%) | 195 (0.7%) | 190 (0.7%) | 227 (0.8%) | 353 (1.3%) |                         |                   |                         |                   |

245 Significance after age adjustment is in bold.

246

247 **Figures**

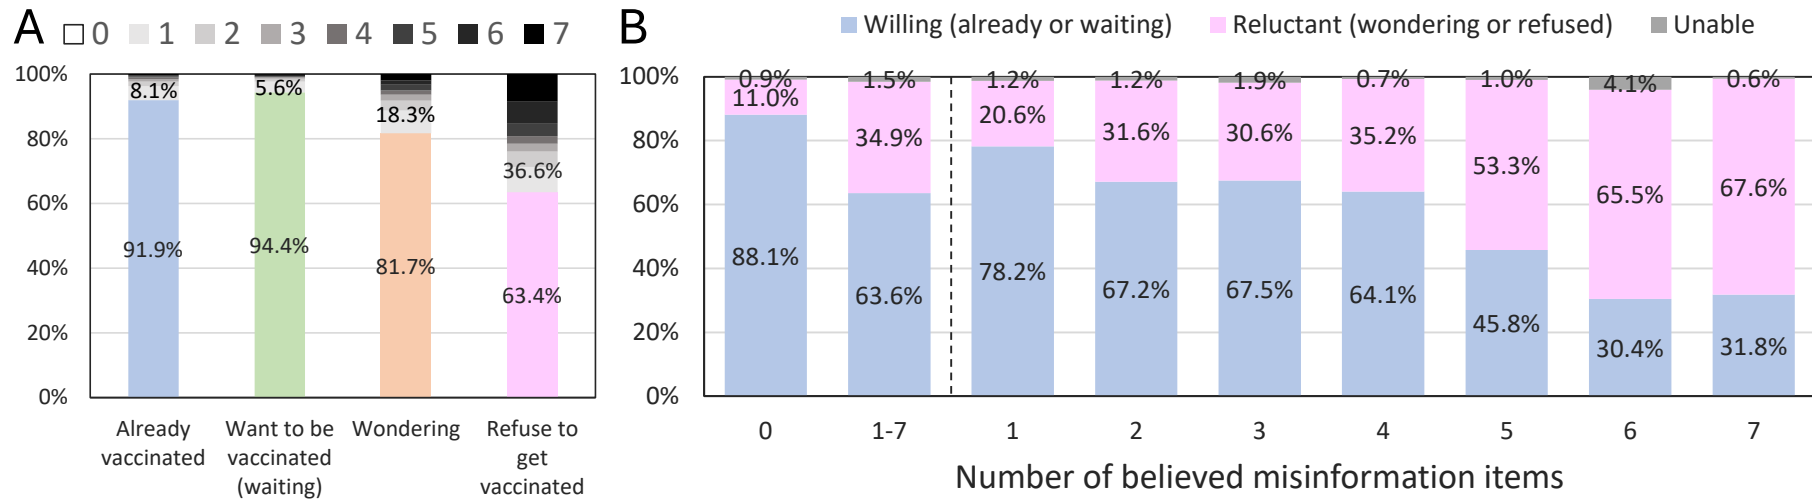

248

249 **Figure 1** Prevalence of vaccine hesitancy and misinformation beliefs

250 A) The prevalence of beliefs about vaccine-related misinformation was stratified by attitudes toward vaccination. B) The proportions of  
 251 vaccine acceptance and hesitancy were shown by the number of believed misinformation items. “1–7” indicates people who believed at  
 252 least one vaccine-related misinformation item. The survey results were adjusted for age, residence, educational level, marital status,  
 253 and self-rated health consciousness to fit the general population in Japan. The results for each age group are shown in [Supplementary](#)  
 254 [Figure 1](#).

255

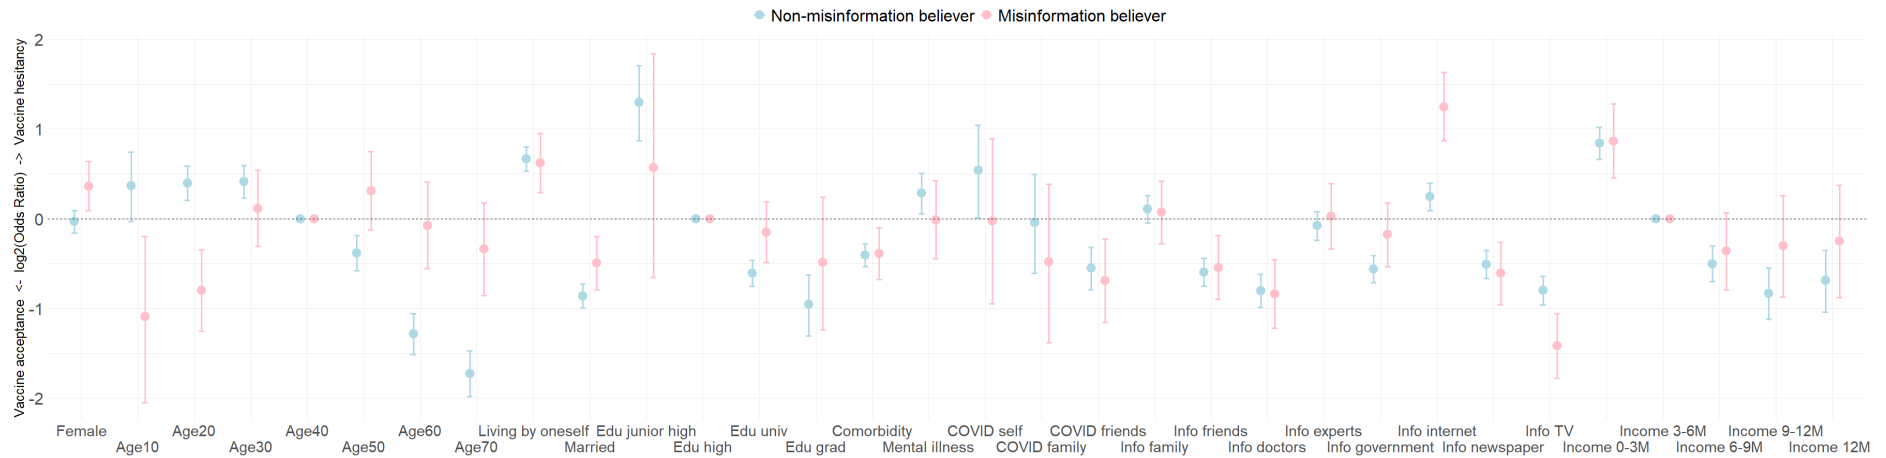

256

257 Figure 2 Factors associated with vaccine hesitancy in non-misinformation and misinformation believers

258 The age-adjusted odds ratios for vaccine hesitancy in non-misinformation believers (zero believed misinformation items) and

259 misinformation believers (2 or more believed misinformation items) are shown. Vertical lines indicate 95% confidence intervals.

260
